# Supplementary material
Source: Springer Nature journal article supplement (https://www.springermedizin.de/resource/supplementary/12881_2008_437_MOESM2_ESM.pdf/9450650)
Supplement: MOESM2 [file 9450650]

**Table S1**

Clinical predictors of plasma CRP, IL-6 and fibrinogen levels in COPD patients which retained in the best-fit multiple linear regression models\*

| <i>Predictive parameter</i> | <i>Coefficient (standard error)</i> | <i>95%CI</i>    | <i>P value</i> |
|-----------------------------|-------------------------------------|-----------------|----------------|
| <b>Ln (IL-6)</b>            |                                     |                 |                |
| Age                         | 0.029 (0.006)                       | 0.017-0.041     | 0.001          |
| Sex                         | 0.248 (0.108)                       | 0.036-0.461     | 0.022          |
| 6MWD                        | -0.002 (0.000)                      | -0.003 - -0.001 | <0.001         |
| <b>Ln (CRP)</b>             |                                     |                 |                |
| Age                         | 0.011 (0.009)                       | -0.006-0.029    | 0.205          |
| Sex                         | 0.382 (0.162)                       | 0.064-0.701     | 0.019          |
| BMI                         | 0.029 (0.014)                       | 0.001-0.058     | 0.045          |
| 6MWD                        | -0.002 (0.01)                       | -0.003-0.000    | 0.012          |
| <b>Ln (fibrinogen)</b>      |                                     |                 |                |
| Age                         | 0.004 (0.001)                       | 0.001-0.007     | 0.005          |
| Sex                         | 0.041 (0.027)                       | -0.012-0.093    | 0.126          |
| 6MWD                        | -0.0002 (0.000)                     | 0.000-0.000     | 0.017          |

\*Following variables were entered into the full models:

age (years), sex (female/male), tobacco consumption (pack-years smoked), smoking status (former/current), post-bronchodilator FEV1 (%pred), BMI (kg/m<sup>2</sup>), PaO<sub>2</sub> (kPa), PaCO<sub>2</sub> (kPa), diastolic and systolic blood pressure (mm/Hg), 6MWD (meters), long-term oxygen therapy (yes/no), and Medical research council dyspnea score (points), long-term oxygen therapy (yes/no).

Age and sex were entered in all final models.
